# Supplementary material for: Microbes within the building envelope—a case study on the patterns of colonization and potential sampling bias
Source: PeerJ. 2023 Nov 17;11:e16355. doi: 10.7717/peerj.16355 (PMC10658902; doi:10.7717/peerj.16355)
Supplement: Supplemental Information 5 — Lists of genera driving the composition variation in each comparison of cardinal directions. [file peerj-11-16355-s005.xlsx]

## Sheet: FUNGI
SIMPER OUTPUT FOR FUNGI
SIMPER’s output lists ASVs which cumulatively explain 70%+ of the variation between each comparison.
The numbers correspond to the ASVs cumulative.
East-North
Mortierella	Heterobasidion	Antrodia	Phialocephala	Plenodomus	Sarocladium
0.167194	0.324499	0.438454	0.547224	0.63638	0.714478
East-Internal
Skvortzovia	Mortierella	Heterobasidion	Antrodia	Ciliophora	Plenodomus	Ceriporiopsis
0.143118	0.265838	0.379043	0.488721	0.587592	0.681678	0.77247
East-West
Aspergillus	Heterobasidion	Antrodia	Humaria	Mortierella	Plenodomus
0.177308	0.303416	0.413359	0.518573	0.61864	0.702891
East-South
Heterobasidion	Skvortzovia	Mortierella	Antrodia
	0.250751	0.475571	0.598395	0.714872
North-Internal
Skvortzovia	Mortierella	Ciliophora	Phialocephala	Ceriporiopsis	Heterobasidion	Sarocladium
0.143688	0.267029	0.366397	0.464128	0.556395	0.633676	0.709406
North-West
Aspergillus	Mortierella	Heterobasidion	Phialocephala	Phialemonium	Cortinarius	Sarocladium
0.192759	0.29948	0.404182	0.505228	0.605844	0.693652	0.771924
North-South
Heterobasidion	Skvortzovia	Mortierella	Phialocephala	Sarocladium
0.238656	0.454826	0.571798	0.671013	0.747868
Internal-West
Aspergillus	Skvortzovia	Ciliophora	Ceriporiopsis	Cortinarius	Humaria
0.181654	0.337349	0.444698	0.543102	0.628096	0.710452
Internal-South
Skvortzovia	Heterobasidion	Ciliophora	Ceriporiopsis
0.261144	0.513508	0.625997	0.727259
West-South
Heterobasidion	Skvortzovia	Aspergillus	Cortinarius
0.227456	0.44231	0.616738	0.705579

## Sheet: BACTERIA
SIMPER OUTPUT FOR BACTERIA
SIMPER’s output lists ASVs which cumulatively explain 70%+ of the variation between each comparison.
The numbers correspond to the ASVs cumulative.
East - North
Acinetobacter	Sphingomonas	Herbaspirillum	Bacteroides	Pseudomonas	Shewanella
0.230197	0.371542	0.477667	0.573789	0.665756	0.738887
East-Internal
Methylobacterium-Methylorubrum	Sphingomonas	Bacteroides	Acinetobacter	Pseudomonas	Bradyrhizobium
0.176021	0.308969	0.42709	0.542679	0.636421	0.707622
East-West
Herbaspirillum	Sphingomonas	Bacteroides	Methylobacterium-Methylorubrum	Pseudomonas	Acinetobacter
0.173792	0.321418	0.435287	0.540644	0.62837	0.704509
East-South
Acinetobacter	Sphingomonas	Bacteroides	Herbaspirillum	Pseudomonas	Methylobacterium-Methylorubrum
0.18723	0.330219	0.467772	0.567161	0.662071	0.738853
North-Internal
Acinetobacter	Sphingomonas	Methylobacterium-Methylorubrum	Herbaspirillum	Shewanella
0.251963	0.394805	0.536828	0.658849	0.726718
North-West
Acinetobacter	Herbaspirillum	Sphingomonas	Shewanella	Hydrogenophilus
0.264587	0.450946	0.614559	0.696661	0.753979
North-South
Acinetobacter	Sphingomonas	Bacteroides	Herbaspirillum	Shewanella
0.270767	0.429326	0.555629	0.674995	0.740519
Internal-West
Methylobacterium-Methylorubrum	Herbaspirillum	Sphingomonas	Acinetobacter	Bacteroides	Bradyrhizobium
0.196406	0.387141	0.52603	0.61397	0.686733	0.756302
Internal-South
Acinetobacter	Methylobacterium-Methylorubrum	Bacteroides	Sphingomonas	Herbaspirillum
0.197553	0.362475	0.508428	0.645193	0.754413
West-South
Herbaspirillum	Acinetobacter	Sphingomonas	Bacteroides	Methylobacterium-Methylorubrum
0.187364	0.361595	0.515173	0.664746	0.73384
