# Supplementary material for: Microbes within the building envelope—a case study on the patterns of colonization and potential sampling bias
Source: PeerJ. 2023 Nov 17;11:e16355. doi: 10.7717/peerj.16355 (PMC10658902; doi:10.7717/peerj.16355)
Supplement: Supplemental Information 6 — Statistical tables showing the results of the Kruskal–Wallis tests, and the differences between each cardinal direction. Genera identified in the SIMPER test were analysed. [file peerj-11-16355-s006.xlsx]

## Sheet: FUNGI
DUNN TESTS
Full statistical comparisons from the Kruskal-Wallis test and the dunn test.
Tables show differences in average relative abundance and the adjusted p-value for each comparison. P-values in the table are adjusted using Bonferroni method.
* inidicates a significant P-value
Ciliophora													Antrodia
Kruskal-Wallis chi-squared = 1.5835, df = 4, p-value = 0.81													Kruskal-Wallis chi-squared = 5.367, df = 4, p-value = 0.25
Comparison of x by group													Comparison of x by group
(Bonferroni)													(Bonferroni)
Col Mean-|													Col Mean-|
Row Mean | east internal north south													Row Mean | east internal north south
---------+--------------------------------------------													---------+--------------------------------------------
internal | 0.000000													internal | 1.649004
| 1.0000													| 0.4957
|													|
north | -1.333262 -1.266794													north | 0.461514 -1.266794
| 0.9122 1.0000													| 1.0000 1.0000
|													|
south | -1.121504 -1.079168 0.028448													south | 1.546903 0.000000 1.183438
| 1.0000 1.0000 1.0000													| 0.6094 1.0000 1.0000
|													|
west | -0.893570 -0.851985 0.405961 0.322271													west | 1.729490 0.000000 1.333262 0.000000
| 1.0000 1.0000 1.0000 1.0000													| 0.4186 1.0000 0.9122 1.0000
Cortinarius													Mortierella
Kruskal-Wallis chi-squared = 3.0779, df = 4, p-value = 0.54													Kruskal-Wallis chi-squared = 2.1464, df = 4, p-value = 0.71
Comparison of x by group													Comparison of x by group
(Bonferroni)													(Bonferroni)
Col Mean-|													Col Mean-|
Row Mean | east internal north south													Row Mean | east internal north south
---------+--------------------------------------------													---------+--------------------------------------------
internal | 1.264787													internal | -0.404264
| 1.0000													| 1.0000
|													|
north | -0.639913 -1.915977													north | 0.106684 0.519432
| 1.0000 0.2768													| 1.0000 1.0000
|													|
south | 0.047082 -1.096381 0.616491													south | 0.669748 1.009383 0.595049
| 1.0000 1.0000 1.0000													| 1.0000 1.0000 1.0000
|													|
west | 0.561489 -0.729427 1.222599 0.455129													west | 0.914120 1.275844 0.841943 0.147866
| 1.0000 1.0000 1.0000 1.0000													| 1.0000 1.0000 1.0000 1.0000
Aspergillus
Kruskal-Wallis chi-squared = 6.2536, df = 4, p-value = 0.18													Plenodomus
Comparison of x by group													Kruskal-Wallis chi-squared = 2.2575, df = 4, p-value = 0.69
(Bonferroni)													Comparison of x by group
Col Mean-|													(Bonferroni)
Row Mean | east internal north south													Col Mean-|
---------+--------------------------------------------													Row Mean | east internal north south
internal | -0.071324													---------+--------------------------------------------
| 1.0000													internal | 0.601170
|													| 1.0000
north | -0.394673 -0.301237													|
| 1.0000 1.0000													north | 1.028207 0.355253
|													| 1.0000 1.0000
south | 0.570691 0.613530 0.938052													|
| 1.0000 1.0000 1.0000													south | 1.409868 0.813988 0.539300
|													| 0.7929 1.0000 1.0000
west | -1.870152 -1.711796 -1.546076 -2.243406													|
| 0.3073 0.4347 0.6104 0.1244													west | 0.945768 0.300585 -0.046736 -0.563947
													| 1.0000 1.0000 1.0000 1.0000
Heterobasidion													Skvortzovia
Kruskal-Wallis chi-squared = 3.481, df = 4, p-value = 0.48													Kruskal-Wallis chi-squared = 7.585, df = 4, p-value = 0.11
Comparison of x by group													Comparison of x by group
(Bonferroni)													(Bonferroni)
Col Mean-|													Col Mean-|
Row Mean | east internal north south													Row Mean | east internal north south
---------+--------------------------------------------													---------+--------------------------------------------
internal | 1.083541													internal | -2.536854
| 1.0000													| 0.0559
|													|
north | 0.542123 -0.605436													north | -1.124513 1.555008
| 1.0000 1.0000													| 1.0000 0.5997
|													|
south | -0.830269 -1.777008 -1.336261													south | -1.878773 0.482093 -0.936722
| 1.0000 0.3778 0.9073													| 0.3014 1.0000 1.0000
|													|
west | 0.375058 -0.725936 -0.152906 1.165732													west | -1.653197 0.960592 -0.591090 0.400109
| 1.0000 1.0000 1.0000 1.0000													| 0.4915 1.0000 1.0000 1.0000
Phialocephala													Ceriporiopsis
Kruskal-Wallis chi-squared = 7.9848, df = 4, p-value = 0.09													Kruskal-Wallis chi-squared = 9.0187, df = 4, p-value = 0.06
Comparison of x by group													Comparison of x by group
(Bonferroni)													(Bonferroni)
Col Mean-|													Col Mean-|
Row Mean | east internal north south													Row Mean | east internal north south
---------+--------------------------------------------													---------+--------------------------------------------
internal | -0.023305													internal | -0.922890
| 1.0000													| 1.0000
|													|
north | -1.742972 -1.631977													north | -0.587030 0.396632
| 0.4067 0.5134													| 1.0000 1.0000
|													|
south | 0.634007 0.631110 2.200043													south | 0.000000 0.833065 0.521062
| 1.0000 1.0000 0.1390													| 1.0000 1.0000 1.0000
|													|
west | 0.708841 0.699159 2.478571 0.000000													west | -2.639823 -1.594082 -2.152443 -2.361129
| 1.0000 1.0000 0.0660 1.0000													| 0.0415* 0.5546 0.1568 0.0911
Sarocladium
Kruskal-Wallis chi-squared = 6.2222, df = 4, p-value = 0.18
Comparison of x by group
(Bonferroni)
Col Mean-|
Row Mean | east internal north south
---------+--------------------------------------------
internal | 0.000000
| 1.0000
|
north | -1.956798 -1.859244
| 0.2519 0.3150
|
south | 0.000000 0.000000 1.736903
| 1.0000 1.0000 0.4120
|
west | 0.000000 0.000000 1.956798 0.000000
| 1.0000 1.0000 0.2519 1.0000

## Sheet: BACTERIA
DUNN TESTS
Full statistical comparisons from the Kruskal-Wallis test and the dunn test.
Tables show differences in average relative abundance and the adjusted p-value for each comparison. P-values in the table are adjusted using Bonferroni method.
* inidicates a significant P-value
Acinetobacter													Sphingomonas
Kruskal-Wallis chi-squared = 3.8402, df = 4, p-value = 0.43													Kruskal-Wallis chi-squared = 4.3151, df = 4, p-value = 0.37
Comparison of x by group													Comparison of x by group
(Bonferroni)													(Bonferroni)
Col Mean-|													Col Mean-|
Row Mean | east internal north south													Row Mean | east internal north south
---------+--------------------------------------------													---------+--------------------------------------------
internal | 1.298247													internal | -1.672998
| 0.9710													| 0.4716
|													|
north | -0.572280 -1.886318													north | -1.321447 0.474545
| 1.0000 0.2963													| 0.9318 1.0000
|													|
south | 0.172635 -1.005771 0.685760													south | -1.239835 0.317135 -0.103903
| 1.0000 1.0000 1.0000													| 1.0000 1.0000 1.0000
|													|
west | 0.526396 -0.796347 1.118548 0.298188													west | -1.859935 -0.100379 -0.608698 -0.423741
| 1.0000 1.0000 1.0000 1.0000													| 0.3145 1.0000 1.0000 1.0000
Herbaspirillum													Bacteroides
Kruskal-Wallis chi-squared = 7.7324, df = 4, p-value = 0.1													Kruskal-Wallis chi-squared = 4.0386, df = 4, p-value = 0.4
Comparison of x by group													Comparison of x by group
(Bonferroni)													(Bonferroni)
Col Mean-|													Col Mean-|
Row Mean | east internal north south													Row Mean | east internal north south
---------+--------------------------------------------													---------+--------------------------------------------
internal | -0.569131													internal | 0.937392
| 1.0000													| 1.0000
|													|
north | 0.317529 0.890260													north | 1.925998 0.860585
| 1.0000 1.0000													| 0.2705 1.0000
|													|
south | -0.015702 0.498628 -0.298018													south | 0.408270 -0.453298 -1.289104
| 1.0000 1.0000 1.0000													| 1.0000 1.0000 0.9868
|													|
west | -2.141852 -1.473045 -2.540235 -1.900028													west | 0.807583 -0.167391 -1.087928 0.314054
| 0.1610 0.7037 0.0554 0.2871													| 1.0000 1.0000 1.0000 1.0000
Pseudomonas													Shewanella
Kruskal-Wallis chi-squared = 7.5798, df = 4, p-value = 0.11													Kruskal-Wallis chi-squared = 3.1503, df = 4, p-value = 0.53
Comparison of x by group													Comparison of x by group
(Bonferroni)													(Bonferroni)
Col Mean-|													Col Mean-|
Row Mean | east internal north south													Row Mean | east internal north south
---------+--------------------------------------------													---------+--------------------------------------------
internal | 0.776271													internal | 0.689275
| 1.0000													| 1.0000
|													|
north | -1.477524 -2.206637													north | -0.785585 -1.459227
| 0.6977 0.1367													| 1.0000 0.7225
|													|
south | 0.360964 -0.353379 1.683230													south | 0.769011 0.117793 1.489277
| 1.0000 1.0000 0.4617													| 1.0000 1.0000 0.6821
|													|
west | 0.877328 0.060227 2.387970 0.423741													west | 0.035093 -0.655815 0.822002 -0.737623
| 1.0000 1.0000 0.0847 1.0000													| 1.0000 1.0000 1.0000 1.0000
Methylobacterium-Methylorubrum													Bradyrhizobium *
Kruskal-Wallis chi-squared = 4.7644, df = 4, p-value = 0.31													Kruskal-Wallis chi-squared = 10.547, df = 4, p-value = 0.03
Comparison of x by group													Comparison of x by group
(Bonferroni)													(Bonferroni)
Col Mean-|													Col Mean-|
Row Mean | east internal north south													Row Mean | east internal north south
---------+--------------------------------------------													---------+--------------------------------------------
internal | -1.683267													internal | -2.135915
| 0.4616													| 0.1634
|													|
north | 0.013008 1.753092													north | 0.598621 2.777612
| 1.0000 0.3979													| 1.0000 0.0274*
|													|
south | 0.266836 1.776199 0.263257													south | -0.581000 1.368961 -1.129698
| 1.0000 0.3785 1.0000													| 1.0000 0.8551 1.0000
|													|
west | -0.789703 0.930314 -0.832521 -0.973168													west | -1.650280 0.562435 -2.311197 -0.895054
| 1.0000 1.0000 1.0000 1.0000													| 0.4944 1.0000 0.1041 1.0000
Hydrogenophilus
Kruskal-Wallis chi-squared = 4.1577, df = 4, p-value = 0.39
Comparison of x by group
(Bonferroni)
Col Mean-|
Row Mean | east internal north south
---------+--------------------------------------------
internal | 0.097047
| 1.0000
|
north | 0.783090 0.643690
| 1.0000 1.0000
|
south | -0.266836 -0.344365 -0.969895
| 1.0000 1.0000 1.0000
|
west | -1.175780 -1.218109 -2.003255 -0.784813
| 1.0000 1.0000 0.2257 1.0000
